# Supplementary material for: Sortase mediated protein ubiquitination with defined chain length and topology
Source: Royal Society of Chemistry journal article supplement (doi:10.1039/d3cb00229b), 2024-01-01
Supplement: d3cb00229b1.pdf [file d3cb00229b1.pdf]

## Supplemental Information

### General Methods

4-20% gradient SDS-PAGE gels were run at 180 V for 45 minutes and stained with Coomassie Blue dye unless used for Western blot.

For Western blots, gels were transferred to a nitrocellulose or PVDF membrane with Bjerrum Schafer-Nielsen buffer using Bio-Rad Transblot Turbo transfer system. Membrane was blocked at room temperature in 5% milk in TBST before 4 C overnight incubation with 1:1000 diluted primary antibody in 3% Bovine Serum Albumin (BSA) in TRIS-Buffered Saline with Tween (TBST) (anti-ubiquitin (PD41), Santa Cruz, anti-K48 linkage specific ubiquitin (D9D5), Cell Signaling Technology [CST], and anti-K63 linkage specific ubiquitin (D7A11, CST). Nitrocellulose membrane was washed 3 x 5 minutes at room temperature in TBST before incubating with 1:1000 diluted appropriate secondary antibody (anti-rabbit [#7074] or anti-mouse [#7076], CST) in 5% milk in TBST at room temperature for 1 hour. Blots were washed again 3 x 5 minutes in TBST before visualization using Amersham ECL Western Blotting Detection Kit with Bio-Rad ChemiDoc XRS+ imaging system.

### Cloning of Constructs

Cloning strategy was based on Q5 Site-Directed Mutagenesis (Q5 Hot Start High Fidelity Master Mix, New England Biolabs). All primers (Supplemental Table II) were designed based on this strategy and were purchased from Integrated DNA Technologies (IDT).

pET24a-UbK0 cDNA clone was purchased from MRC-PPU at Dundee and was used as the basis for cloning. Q5 Site-Directed Mutagenesis was used to make Sortase compatible mutants UbKX-Srt to mutate LRLRGG to LLPLTGG. UbKXSrt insert was subcloned into pET28 using BamHI and XhoI strategy and ubiquitin single lysine mutants were generated using Q5 Site-Directed Mutagenesis. C-terminal His-tag was added to these constructs using Q5 Site-Directed Mutagenesis.

pet30b-5M SrtA and pet30b-7M SrtA plasmids were a gift from Hidde Ploegh (Addgene plasmids # 51140 and # 51141). pET28a-sfGFP was a gift from Ryan Mehl (Addgene plasmid # 85492) and V1G mutation and N150TAG mutations were added using Q5 Site-Directed Mutagenesis. pDULE-CNF was a gift from Ryan Mehl (Addgene plasmid # 85494). pET28-UBE1 was a gift from Deschaies lab. pDEST17-Cdc34a was a gift from Wade Harper (Addgene plasmid # 18674). pET28aLIC-UEV1 was a gift from Cheryl Arrowsmith (Addgene plasmid # 25619). pETSUMO-hUbc13 was a gift from Cynthia Wolberger (Addgene plasmid # 51131). pET16b-PCNA was a gift from Andrew Deans (Addgene plasmid # 134898). K164TAG mutation and C-terminal His-tag were added via Q5 Site-Directed Mutagenesis.

### Intact protein mass spectrometry

Mass spectrometry was run on an Agilent 6545XT LC-QTOF instrument using a reversed-phase PLRPS column (Agilent) for separation of species for intact protein mass spectrometry. Protein samples were buffer exchanged into 150 mM NaCl and 50 mM TRIS pH 8.0 buffer or MilliQ purified water and concentrated to ~1 mg/mL before injection onto LC-QTOF. Samples were eluted using a gradient from 5-95% acetonitrile in water supplemented with 0.1% formic acid over 13 minutes. All mass spectrometry data was processed using Agilent MassHunter BioConfirm 12.0.

## Protein construct sequences

Ub WT

MQIFVKTTLTGKTITLEVEPSDTIENVKAKIQDKEGIPPDQQLIFAGKQLEDGRTLSDYNI  
QKESTLHLVLRRLGG

UbK0Srt

MQIFVRTLTGRTITLEVEPSDTIENVRARIQDREGIPPDQQLIFAGRQLEDGRTLSDYNIQ  
RETLHLVLLPLTGG

UbK0Srt-His

MQIFVRTLTGRTITLEVEPSDTIENVRARIQDREGIPPDQQLIFAGRQLEDGRTLSDYNIQ  
RETLHLVLLPLTGGHHHHHHH

UbK48Srt

MQIFVRTLTGRTITLEVEPSDTIENVRARIQDREGIPPDQQLIFAGKQLEDGRTLSDYNIQ  
RETLHLVLLPLTGG

UbK48Srt-His

MQIFVRTLTGRTITLEVEPSDTIENVRARIQDREGIPPDQQLIFAGKQLEDGRTLSDYNIQ  
RETLHLVLLPLTGGHHHHHHH

UbK63Srt

MQIFVRTLTGRTITLEVEPSDTIENVRARIQDREGIPPDQQLIFAGRQLEDGRTLSDYNIQ  
KESTLHLVLLPLTGG

UbK63Srt-His

MQIFVRTLTGRTITLEVEPSDTIENVRARIQDREGIPPDQQLIFAGRQLEDGRTLSDYNIQ  
KESTLHLVLLPLTGGHHHHHHH

SrtA 5M

MQAKPQIPKDKSKVAGYIEIPDADIKEPVYPGPATREQLNRGVSF AEENESLDDQNISIAG  
HTFIDRPNYQFTNLKAAKKGSMVYFKVGNETRKYKMTSIRNVKPTAVEVLDEQKGD  
KQLTLITCDDYNEETGVWETRKIFVATEVKLEHHHHHHH

SrtA 7M

MQAKPQIPKDKSKVAGYIEIPDADIKEPVYPGPATREQLNRGVSF AKENQSLDDQNISIA  
GHTFIDRPNYQFTNLKAAKKGSMVYFKVGNETRKYKMTSIRNVKPTAVEVLDEQKGD  
DKQLTLITCDDYNEETGVWETRKIFVATEVKLEHHHHHHH

UBE1

MGSSHHHHHHSSGLVPRGSHMSSSPLSKKRRVSGPDPKPGSNCS PAQSALSEVSSVPTN  
GMAKNGSEADIDESLYSRQLYVLGHEAMKMLQTSSVLVSGLRGLGVEIAKNIILGGVKA  
VTLHDQGTQWADLSSQFYLR EEDIGKNRAEVSQPRLAELNSYVPVTA YTGPLVEDFLS  
SFQVVVLTNSPLEAQLRVGEFCHSRGIKLVVADTRGLFGQLFCDFGEEMVLTDSNGEQP

LSAMVSMVTKDNPVVTCLDEARHGFETGDFVSFSEVQGMQLNGCQPMEIKVLGPYT  
FSICDTSNFSYIRGGIVSQQVQVKKISFKSLPASLVEPDFVMTDFAKYSRPAQLHIGFQA  
LHQFCALHNQPPRPRNEEDATELVGLAQAVNARSPPSVKQNSLDEDLIRKLAYVAAGD  
LAPINAFIIGGLAAQEVKACSGKFMPIQWLYFDALECLPEDKEALTEEKCLPRQNR  
DGQVAVFGSDFQEKLSKQKYFLVGAGAIGCELLKNFAMIGLGCGEVGVVTDMDTIE  
KSNLNRQFLFRPWDVTKLKSDTAAAAVRQMNPYIQVTSHQNRVGPDTERIYDDDDFFQN  
LDGVANALDNIDARMYMDRRCVYYRKPLLESGLTGTGKGNVQVVIPFLTESYSSSQDPPE  
KSIPICTLKNFPNAIEHTLQWARDEFEGFLKQPAENVNQLTDSKFVERTLRLAGTQPLE  
VLEAVQRSLVLQRPQTWGDVTVACHHWHTQYCANNIRQLLHNFPPDQLTSSGAPFWS  
GPKRCPHPLTFDVNNTLHLDYVMAAANLFAQTYGLTGSQDRAAVASLLQSVQVPEFTP  
KSGVKIHVSDQELQSANASVDDSRLEELKATLPSDKLPGFKMYPIDFEKDDDSNFHMD  
FIVAASNRAENYDISPADRHKSKLIAGKIIPAIATTTAAVVGLVCLELYKVVQGHQQLD  
SYKNGFLNLALPFFGFSEPLAAPRHQYYNQEWTLWDRFEVQGLQPNGEEMTLKQFLDY  
FKTEHKLEITMLSQGVSMLYSFFMPAAKLERLDQPMTEIVSRVSKRKLGRHVRLVLE  
LCCNDESGEDVEVPYVRYTIR

Cdc34

MSYYHHHHHHLESTSLYKKAGSAAAPFTMARPLVPSSQKALLELKGLQEPPVEGFRV  
TLVDEGDLYNWEVAIFGPPNTYYEGGYFKARLKFIDYPYSPPAFRFLTKMWHPNYET  
GDVCISILHPPVDDPQSGELPSEWRNPTQNVRTILLSVISLLNEPNTFSPANVDASVMYRK  
WKESKKGKDREYTDIIRKQVLGTVDAERDGVKVPTTLAEYCVKTKAPAPDEGSDFDYD  
DYYEDGEVEEEEADSCFGDDEDDSGTEES

His-SUMO-hUbc13/UBE2N

MGHHHHHHPSGVKTENNDHINLKVAGQDGSVVQFKIKRHTPLSKLMKAYCERQGLSM  
RQIRFRFDGQPINETDTPAQLEMEDEDTIDVFQQQTGGMAGLPRRIKETQRLLAEPVPGI  
KAEPDESNARYFHVVIAGPQDSPFEGGTFKLELFLPEEYPMAPKVRFMTKIYHPNVDK  
LGRICLDILKDKWSPALQIRTVLLSIQALLSAPNPDDPLANDVAEQWKTNEAQAIETARA  
WTRLYAMNNI

UEV1/UBE2V1

MGSSHHHHHHSSGLVPRGSTGVKVPNRNFRLLLEELEEGQKGVGDGTVSWGLEDDEDMT  
LTRWTGMIIGPPRTIYENRIYSLKIECGPKYPEAPPFVRFVTKINMNGVNSSNGVVDPRAI  
SVLAKWQNSYSIKVVLQELRRLMMSKENMKLPQPPEGQCYSN

sfGFPV1G

MGSKGEELFTGVVPILVELDGDVNGHKFSVRGEGEGDATNGKLTCLKFICTTGKLPVWPW  
TLVTTLTYGVQCFSRYPDHMKRHDFFKSAMPEGYVQERTISFKDDGTYKTRAEVKFEG  
DTLVNRIELKGIKEDGNILGHKLEYNFNHNHYITADKQKNGIKANFKIRHNVEDGSV  
QLADHYQQNTPIGDGPVLLPDNHVLSLQSVLSKDPNEKRDHMLLEFVTAAGITHGMD  
ELYKGSHHHHHHH

sfGFPN150pAzF

MVSKGEELFTGVVPIVLVDGDVNGHKFSVRGEGEGDATNGKLTCLKFICTTGKLPVWP  
TLVTTLYGVQCFSRYPDHMKRHDFFKSAMPEGYVQERTISFKDDGTYKTRAEVKFEG  
DTLVNRIELKGIDFKEDGNILGHKLEYNFNSH(**pAzF**)VYITADKQKNGIKANFKIRHNVE  
DGSVQLADHYQQNTPIGDGPVLLPDNHYLSTQSVLSKDPNEKRDHMLLEFVTAAGITH  
GMDELYKGSHHHHHH

PCNAK164pAzF

MFEARLVQGSILKKVLEALKDLINACWDISSSGVNLQSMDSHVSLSVQLTLRSEGFD  
YRCDRNLAMGVNLTSMKILKCAINEDITLRAEDNADTLALVFEAPNQEKVSDYEMK  
LMDLDVEQLGIPEQEYSCVVKMPSGEFARICRDLSHIGDAVVISCA(**pAzF**)DGVKFSASG  
ELGNGNIKLSQTSNVDKEEEAVTIEMNEPVQLTFALRYLNFFTKATPLSSTVTLSMSADV  
PLVVEYKIADMGLKYYLAPKIEDEESSGSHHHHHHH

### Expression of protein constructs

All ubiquitin constructs were expressed as described previously [1]. Briefly, Ub constructs were expressed in Rosetta2 *E. coli* cells in Lura-Bertani (LB) Miller media (Sigma) supplemented with appropriate antibiotic (Wild-type Ub plasmid contained an Ampicillin resistance marker while all single-lysine and sortase-compatible Ub variants contained a Kanamycin resistance marker). Cells were grown at 37 °C in a shaker to an OD<sub>600</sub> of 0.6-0.8 before inducing with 0.5 mM isopropyl β-D-1-thiogalactopyranoside (IPTG) and expressing at 37 °C for 4 hours or 16 °C for 16 hours before collecting cells by centrifugation. Cell pellets were resuspended in 50 mM TRIS pH 8.0, 150 mM NaCl, protease inhibitor cocktail pellet (Thermo), and 0.1% Triton-X 100, and stored at -80 °C until lysis. Cells were lysed by sonication on ice and lysates were cleared by centrifugation at 13,000 x g for 45 minutes. Supernatant was filtered through an Amicon 30 kDa MWCO centrifugal filtration unit (Millipore) before concentration in a 3 kDa MWCO centrifugal filter. Ubiquitin was further purified by size-exclusion chromatography (SEC, Superdex HiLoad 16/600 S75 column, Cytiva) in a final buffer of 10 mM TRIS pH 8.0 + 150 mM NaCl. Purified protein was concentrated to 5 mg/mL-50 mg/mL (construct-dependent) before flash-freezing in liquid nitrogen and storing at -80 °C for future use.

UBE1 was expressed and purified based off of methods described in [2]. Briefly, UBE1 was expressed in Rosetta2 *E. coli* cells in LB Miller media supplemented with Kanamycin. Cells were grown at 37 °C in a shaker to an OD<sub>600</sub> of 0.6 before cooling the shaker to 16 °C. Cells were induced with 0.5 mM IPTG and expressed protein overnight (~16 hours) before harvesting via centrifugation. Cell pellets were resuspended in UBE1 buffer (50 mM TRIS pH 8.0, 150 mM NaCl, 1 mM DTT) supplemented with a protease inhibitor cocktail pellet (Thermo) and stored at -80 °C until purification. For purification, cells were lysed by sonication on ice and lysates were cleared by centrifugation at 13,000 x g for 45 minutes. Supernatant was incubated with NiNTA-Agarose (Qiagen) at 4 °C for 1 h before purification by immobilized metal affinity chromatography (IMAC). Resin was washed with UBE1 lysis buffer and eluted with lysis buffer supplemented with 100 mM imidazole. Eluted protein was dialyzed into UBE1 lysis buffer overnight before concentration in an Amicon 30 kDa MWCO centrifugal filtration unit (Millipore) and purification by SEC in UBE1 buffer (Superdex HiLoad 16/600 S200 column, Cytiva). Protein was concentrated to ~13 mg/mL before flash-freezing in liquid nitrogen and storing at -80 °C for future use.

Cdc34 was expressed and purified based off of methods described in [3, 4]. Briefly, Cdc34 was expressed in Rosetta2 *E. coli* cells in LB Miller media supplemented with Ampicillin. Cells were grown in a shaker at 37 °C until reaching an OD<sub>600</sub> of 0.6. The temperature in the shaker was adjusted to 16 °C before inducing the cells with 0.5 mM IPTG. Cells expressed protein overnight (~16 hours) before harvesting by centrifugation and resuspension in Cdc34 lysis buffer (450 mM NaCl, 50 mM TRIS pH 7.5, 1 mM DTT, 0.5% Triton X, Protease inhibitor cocktail pellet (Thermo)). Cells were either stored at -80 °C for later use or lysed by sonication. Lysates were cleared by centrifugation at 13,000 xg for 45 minutes. Supernatant was dialyzed overnight at 4 °C into Cdc34 ion exchange buffer A (50 mM TRIS pH 7.5, 150 mM NaCl, 1 mM DTT, 1 mM EDTA). Cdc34 was purified using a gradient from buffer A to buffer B (50 mM TRIS pH 7.5, 2 M NaCl, 1 mM DTT, 1 mM EDTA). Purification was performed using a Mono Q 5/50 GL anion exchange column with 20 column volume (CV) wash of buffer A, then a gradient of 0-25% B over 25 CV followed by a gradient of 25-100% B over 50 CV. Cdc34 should elute at ~470 mM NaCl. Purified Cdc34 was then concentrated using an Amicon 3 kDa MWCO centrifugal filtration unit (Millipore) before purification by SEC (Superdex HiLoad 16/600 S75 column, Cytiva) in Cdc34 sizing buffer (50 mM TRIS pH 7.5, 1 mM DTT, 450 mM NaCl). Protein was concentrated in Cdc34 sizing buffer supplemented with 5% glycerol before flash-freezing in liquid nitrogen and storage at -80 °C for future use.

UEV1 and His-SUMO-hUbc13 were expressed in Rosetta 2 *E. coli* cells in LB Miller media supplemented with appropriate antibiotics (UEV1 plasmid contains a Kanamycin selection marker while Ubc13 plasmid contains an Ampicillin resistance marker). Cells were grown in a shaker at 37 °C to an OD<sub>600</sub> of 0.6 before induction with 0.5 mM IPTG. The shaker temperature was adjusted to 16 °C and cells expressed for ~20 hours before harvesting by centrifugation. Cells were resuspended in UEV1/Ubc13 lysis buffer (50 mM TRIS pH 8.0, 300 mM NaCl, 1 mM DTT, protease inhibitor cocktail pellet [Thermo]) and stored at -80 °C for future use. Cells were lysed by sonication, lysates cleared by centrifugation as above, and the supernatant was purified by IMAC (Qiagen). Eluted protein was dialyzed overnight into UEV1/Ubc13 sizing buffer (50 mM TRIS pH 8.0, 150 mM NaCl, 1 mM DTT) and purified by SEC (Superdex HiLoad 16/600 S75 column, Cytiva). Purified protein was concentrated and flash-frozen in liquid nitrogen before storage at -80 °C for future use.

Sortase variants were expressed in Rosetta2 *E. coli* cells in LB Miller media supplemented with Kanamycin and induced at OD<sub>600</sub> = 0.6 with 0.5 mM IPTG before expression overnight at 16 °C. Cells were harvested by centrifugation and stored at -80 °C until purification. For purification, cells were resuspended in lysis buffer (150 mM NaCl, 50 mM TRIS pH 7.5, protease inhibitor cocktail pellet [Thermo]), lysed by sonication, and lysates cleared as above. Sortase variants were purified by IMAC (Qiagen), dialyzed overnight into their respective reaction buffers (SrtA 7M in 150 mM NaCl, 50 mM TRIS pH 7.5, and SrtA 5M in 150 mM NaCl, 50 mM TRIS pH 7.5, and 5 mM CaCl<sub>2</sub>), and concentrated before use in assays. Sortase was concentrated to 20 mg/mL, flash frozen in liquid nitrogen, and stored at -80 °C until use in assays.

sfGFPV1G was expressed in Rosetta2 *E. coli* cells, grown at 37 °C to an OD<sub>600</sub> = 0.6, induced with 0.5 mM IPTG, expressed at 37 °C overnight, and pelleted as above. Cells were resuspended in sfGFP lysis buffer (300 mM NaCl, 50 mM TRIS 8.0, and protease inhibitor cocktail pellet [Thermo]) lysed by sonication, lysates cleared by centrifugation, and the sfGFP was purified by nickel IMAC (Qiagen). Eluted protein was dialyzed overnight into sfGFP buffer (300 mM NaCl, 50 mM TRIS pH 8.0) before SEC (Superdex HiLoad 16/600 S75 column, Cytiva), flash freezing in liquid nitrogen, and storage at -80 °C.

### **Genetic code expansion in protein constructs**

sfGFP-N150pAzF was expressed in BL21AI *E. coli* cells in 250mL auto-inducing media (AIM, supplemental table I, solutions made according to [5]) supplemented with Kanamycin, Spectinomycin, and 1 mM para-azido-L-phenylalanine (CAS # 33173-53-4, Click Chemistry Tools Cat # 1406). BL21AI cells were co-transformed with pDULE2-CNF machinery plasmid and pET28a-sfGFP-N150TAG plasmid before plating on Kanamycin/Spectinomycin selective media. For expression, cells were shaken at 37 °C in AIM and expressed for 16 hours before collection by centrifugation. Cells were lysed in GFP lysis buffer (50 mM TRIS 8.0, 300 mM NaCl, supplemented with a protease inhibitor cocktail pellet[Thermo]) and lysates cleared by centrifugation. sfGFP was purified using Qiagen Ni-NTA agarose resin for immobilized metal affinity chromatography (IMAC). Briefly, cleared cell lysates were incubated with lysis buffer-equilibrated Ni-NTA agarose resin at 4 °C for 1 h before washes with lysis buffer and lysis buffer supplemented with 20 mM imidazole. Protein was eluted with lysis buffer supplemented with 100 mM imidazole and dialyzed into 50 mM TRIS 8.0, 300 mM NaCl at 4 °C overnight. Protein was concentrated and stored at -80 °C or used directly in assays.

PCNA-164pAzF-His was expressed in BL21AI cells as mentioned above. Briefly, cells were grown in 250 mL autoinduction media (AIM, supplemental table I) in the presence of 100 ug/mL ampicillin, 100 ug/mL of spectinomycin, and para-azido-L-phenylalanine (CAS # 33173-53-4, Click Chemistry Tools Cat # 1406) to a final concentration of 1 mM. The culture was incubated for an additional 16 hours at 37 °C before cells were harvested by centrifugation. Cells were resuspended in PCNA lysis buffer (300 mM NaCl, 50 mM TRIS pH 8.0, protease inhibitor cocktail pellet [Thermo]) before lysis by sonication as outlined above. Lysates were cleared by centrifugation and supernatant was purified by nickel affinity chromatography (Qiagen). Purified protein was dialyzed overnight at 4 °C into 300 mM NaCl, 50 mM TRIS pH 8.0 before purification by SEC (Superdex HiLoad 16/600 S200 column, Cytiva). Purified proteins were concentrated to 5 mg/mL, flash frozen in liquid nitrogen, and stored at -80 °C until further use.

### **Generation of wild-type K48-linked polyubiquitin**

Polyubiquitin synthesis reactions were conducted using 1 μM UBE1, 5 μM Cdc34, 2 mM ATP, 4 mM MgCl<sub>2</sub>, and 400 μM total ubiquitin in 50 mM TRIS pH 8.0. Reactions took place at 37 °C for 4 hours before flash-freezing the reaction in liquid nitrogen and storing at -80 °C for purification. For purification, polyubiquitin chains were isolated using an adapted method from [6]. Briefly, the reactions were thawed from -80 ° on ice and concentrated to ~100 μL before diluting to 1 mL in Buffer A (50 mM Sodium Acetate, pH 4.5). Any precipitated protein was pelleted by centrifugation (10 min at 21,000 x g) before injection onto a HiTrap Capto S 1 mL strong cation exchange column (Cytiva) using the AktaPure system. Protein was purified from 0-50% buffer B (1 M NaCl, 50 mM TRIS pH 4.5) over 370 mL. Purified polyubiquitin chains were adjusted to pH 8.0 by addition of 1 M TRIS, pH 10 and were flash-frozen in liquid nitrogen before storing at -80 °C.

### **Generation of His-tagged K48-linked polyubiquitin**

Synthesis of His-tagged polyubiquitin was performed as above, but with the modification that wild-type monoubiquitin was reacted with UbK48Srt-His in a 3:1 ratio. Reactions were conducted at 37 °C for 4 h on a benchtop shaker before flash freezing in liquid nitrogen and storage at -80 °C

before later purification. His-tagged polyubiquitin was purified using Zymo mini His-spin kit for nickel affinity chromatography. The His-tag was subsequently removed using 20  $\mu$ M SrtA 5M in SrtA 5M reaction buffer (50 mM TRIS pH 7.5, 150 mM NaCl, 5 mM CaCl<sub>2</sub>) for 4 hours at 37 °C in the presence of 1 mM GG peptide (Sigma). Individual mono-, di-, and tri-ubiquitin species bearing the C-terminal sortase recognition motif were isolated from unreacted species by reverse nickel affinity chromatography (briefly, collecting unbound polyubiquitin species from the Zymo mini His-spin kit as product) and further isolated using cation exchange chromatography (HiTrap Capto S 1 mL column, Cytiva) using the same method as mentioned above.

For triubiquitin and higher molecular weight chains, we applied n-1 length chains of wild-type polyubiquitin into the reaction where n= the final length of the desired chain (for example, UbK48<sub>2</sub>-UbK48Srt was made from purified K48-linked wild-type diubiquitin and UbK48Srt-His). The His-tagged polyubiquitin was isolated using nickel affinity chromatography, and the His-tag was cleaved via SrtA 5M using the same method as above. For final purification, sortase-compatible triubiquitin was isolated by size-exclusion chromatography (Superdex HiLoad 16/600 S75 column, Cytiva) over 1.1 column volumes in 10 mM TRIS pH 8.0, 150 mM NaCl. Final triubiquitin was flash frozen in liquid nitrogen and stored at -80 °C until used.

### **Generation of wild-type K63-linked polyubiquitin**

K63-linked polyubiquitin was synthesized using 1  $\mu$ M UBE1, 5  $\mu$ M SUMO-hUbc13, 5  $\mu$ M UEV1, 2 mM ATP, 4 mM MgCl<sub>2</sub>, and 400  $\mu$ M total ubiquitin in 50 mM TRIS, pH 8.0. Reactions were conducted at 37 °C for 1 hour on a tabletop shaker before flash freezing in liquid nitrogen and storage at -80 °C before later purification. Purification was performed in the same manner as for K48-linked polyubiquitin.

### **Generation of His-tagged K63-linked polyubiquitin**

Polyubiquitin synthesis for His-tagged K63-linked polyubiquitin was conducted similarly to the K48-linked wild-type polyubiquitin, however the wild-type ubiquitin was reacted in a 3:1 ratio with UbK63Srt-His. Purifications were conducted in the same manner as outlined above for K48-linked polyubiquitin.

### **Sortylation of ubiquitin onto sfGFP-V1G**

Sortylation reactions were conducted using 5  $\mu$ M SrtA 7M, 20  $\mu$ M sfGFP-V1G, and 60  $\mu$ M UbK0Srt. Reactions took place in SrtA 7M reaction buffer (50 mM TRIS pH 7.5, 150 mM NaCl) while shaking at 37 °C for 16 h before flash-freezing and storage at -80 °C. Purification of UbK0Srt-sfGFP was performed by SEC (Superdex HiLoad 16/600 S75 column, Cytiva) in 50 mM TRIS pH 8.0, 300 mM NaCl. Purified protein was analyzed by SDS-PAGE, flash frozen in liquid nitrogen, and stored at -80 °C until further use.

### **Sortase-mediated cleavage or hydrolysis of C-terminal His tag and UbK0Srt-sfGFP**

Sortase cleavage experiments were performed using SrtA 5M derivative unless otherwise indicated for the experiment. Reactions were conducted using 5  $\mu$ M SrtA 5M, 5  $\mu$ M purified substrate, and 1 mM GG or GGG while shaking at 37 °C for 4 h unless otherwise indicated. Reaction samples were quenched with the addition of 2X Laemmli loading dye before SDS-PAGE analysis.

### **Strain-promoted Azide-DBCO click chemistry**

GGG-DBCO (Click chemistry tools/Vector Laboratories, CCT-1551) and dissolved to a stock concentration of 2.5 mM in DI water. GGG-DBCO and *pAzF* click chemistry was conducted in 50 mM TRIS pH 8.0, 300 mM NaCl. For sfGFP-150*pAzF*, 35  $\mu$ M sfGFP-150*pAzF* (1 equivalent) was reacted with 175  $\mu$ M GGG-DBCO (5 equivalents) at room temperature for 16 h before buffer exchange to remove unreacted GGG-DBCO and subsequent analysis by LC-QTOF. For PCNA-164*pAzF*, 35  $\mu$ M PCNA-164*pAzF* was reacted with 175  $\mu$ M GGG-DBCO at room temperature for 6 hours. An additional 5 equivalents of GGG-DBCO was added to the reaction before reacting at room temperature for an additional 16 hours. Reaction was buffer exchanged by diluting 4x into 300 mM NaCl, 50 mM TRIS 8.0 and re-concentrating using Amicon Ultracentrifuge filter concentrator tubes (Cat # UFC5003) to remove excess GGG-DBCO before analysis by LC-QTOF.

### **Conjugation of ubiquitin chains to POI-*pAzF*-DBCO-GGG**

For both PCNA-164*pAzF* and sfGFP150*pAzF*, sortase-mediated conjugation of polyubiquitin was performed by SrtA 7M. For the reactions, 12  $\mu$ M POI-*pAzF*-DBCO-GGG was reacted with 12  $\mu$ M UbKX<sub>n</sub>Srt and 5  $\mu$ M SrtA 7M in SrtA 7M reaction buffer (50 mM TRIS pH 7.5, 150 mM NaCl). Conjugation took place at 37 °C on a benchtop shaker for 16 hours before analysis by SDS-PAGE and LC-QTOF.



## Supplemental Tables and Figures

Supplemental Table I: Auto-inducing media contents

Autoinducing media was generated using the following components referenced from [2]:

| Media Components                              | Volume (mL) |
|-----------------------------------------------|-------------|
| 5% (w/v) aspartate pH 7.5                     | 20          |
| 10% (v/v) glycerol                            | 20          |
| 25x 18 amino-acid mix <sup>a</sup>            | 16          |
| 20% (w/v) arabinose                           | 1           |
| 10% (w/v) lactose                             | 8           |
| 25x M salts <sup>b</sup>                      | 16          |
| 1M MgSO <sub>4</sub>                          | 0.8         |
| 40% (w/v) glucose                             | 0.5         |
| 5000x trace metal stock solution <sup>c</sup> | 0.08        |
| Sterile water                                 | 167.62      |

<sup>a</sup> 25x 18 amino acid is a 1 L solution mixture consisting of the following:

| Amino Acid                 | MW    | Mass (g) |
|----------------------------|-------|----------|
| Alanine                    | 89.1  | 5        |
| Aspartic acid              | 133.1 | 5        |
| Glutamic acid, sodium salt | 169.1 | 5        |
| Phenylalanine              | 165.2 | 5        |
| Glycine                    | 75.1  | 5        |
| Histidine                  | 155.2 | 5        |
| Isoleucine                 | 131.2 | 5        |
| Lysine-HCl                 | 182.6 | 5        |
| Leucine                    | 131.2 | 5        |
| Methionine                 | 149.2 | 5        |
| Asparagine                 | 132.1 | 5        |
| Proline                    | 115.1 | 5        |
| Glutamine                  | 146.1 | 5        |
| Arginine                   | 174.2 | 5        |
| Serine                     | 105.1 | 5        |
| Threonine                  | 119.1 | 5        |
| Valine                     | 117.1 | 5        |
| Tryptophan                 | 204.2 | 5        |

<sup>b</sup> 25x M salts consist of the following: 0.625 M Na<sub>2</sub>HPO<sub>4</sub>, 0.625 M KH<sub>2</sub>PO<sub>4</sub>, 1.25 M NH<sub>4</sub>HCl, and 0.125 M Na<sub>2</sub>SO<sub>4</sub>

<sup>c</sup> 5000x trace metals solution consists of the following:

| Metal                                               | Concentration (mM) |
|-----------------------------------------------------|--------------------|
| FeCl <sub>3</sub>                                   | 50                 |
| CaCl <sub>2</sub> .2H <sub>2</sub> O                | 20                 |
| MnCl <sub>2</sub> .4H <sub>2</sub> O                | 10                 |
| ZnSO <sub>4</sub> .7H <sub>2</sub> O                | 10                 |
| CoCl <sub>2</sub> .6H <sub>2</sub> O                | 2                  |
| CuCl <sub>2</sub>                                   | 2                  |
| NiCl <sub>2</sub>                                   | 2                  |
| Na <sub>2</sub> SeO <sub>3</sub>                    | 2                  |
| Na <sub>2</sub> MoO <sub>4</sub> .2H <sub>2</sub> O | 2                  |
| H <sub>3</sub> BO <sub>3</sub>                      | 2                  |

Supplemental Table II: Primers used for cloning constructs

| <b>Name of primer</b> | <b>Sequence (5'-3')</b>                      | <b>Template plasmid</b> |
|-----------------------|----------------------------------------------|-------------------------|
| UbK0-LPLTGG-FWD       | TCCCGCTCACAGGTGGGTGAT                        | pET28a-UbK0             |
| UbK0-LPLTGG-REV       | GGACCAGGTGCAGGGTGGACTCT                      | pET28a-UbK0             |
| UbK0-LLPLTGG-FWD      | CTGCTCCCGCTCACAGGTG                          | pET28a-UbK0LPLTGG       |
| UbK0-LLPLTGG-REV      | GACCAGGTGCAGGGTGGACTCT                       | pET28a-UbK0LPLTGG       |
| PCNA-AddHis-FWD       | CCACCACCACTAATGACATATGCTCGAGGATCCG           | pET16b-PCNA             |
| PCNA-AddHis-REV       | TGGTGGTGATGGCTGCCGCTACTTTCTTCATCTTCAATTTTCGG | pET16b-PCNA             |
| PCNA-K164TAG-FWD      | TAGCTGTGCATAGGATGGCGTGA                      | pET16b-PCNA             |
| PCNA-K164TAG-REV      | ATAACAACCTGCATCACCAATATGGCTCAG               | pET16b-PCNA             |
| UbK0Srt-AddHis-FWD    | CCACCACCACTGATAAAGATCCGAATTCGAGCTC           | pET28a-UbKX-Srt         |
| UbK0Srt-AddHis-REV    | TGGTGGTGATGCCACCTGTGAGCGGGAG                 | pET28a-UbKX-Srt         |
| sfGFP-V1G-FWD         | AAGAACTGTTTACCGGCGTTGTG                      | pET28a-sfGFP            |
| sfGFP-V1G-REV         | CACCTTTGCTGCCCATGGTATAT                      | pET28a-sfGFP            |

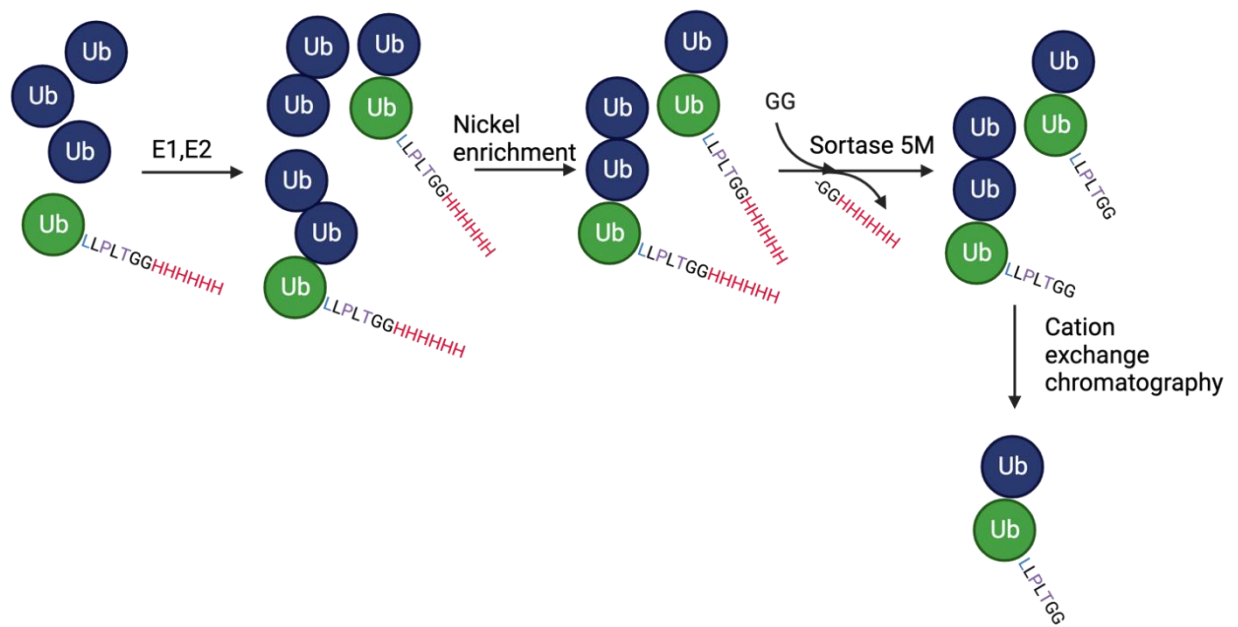

Supplemental Scheme I: Schematic showing overall workflow of the generation of polyubiquitin chains with C-terminal sortase recognition motif.

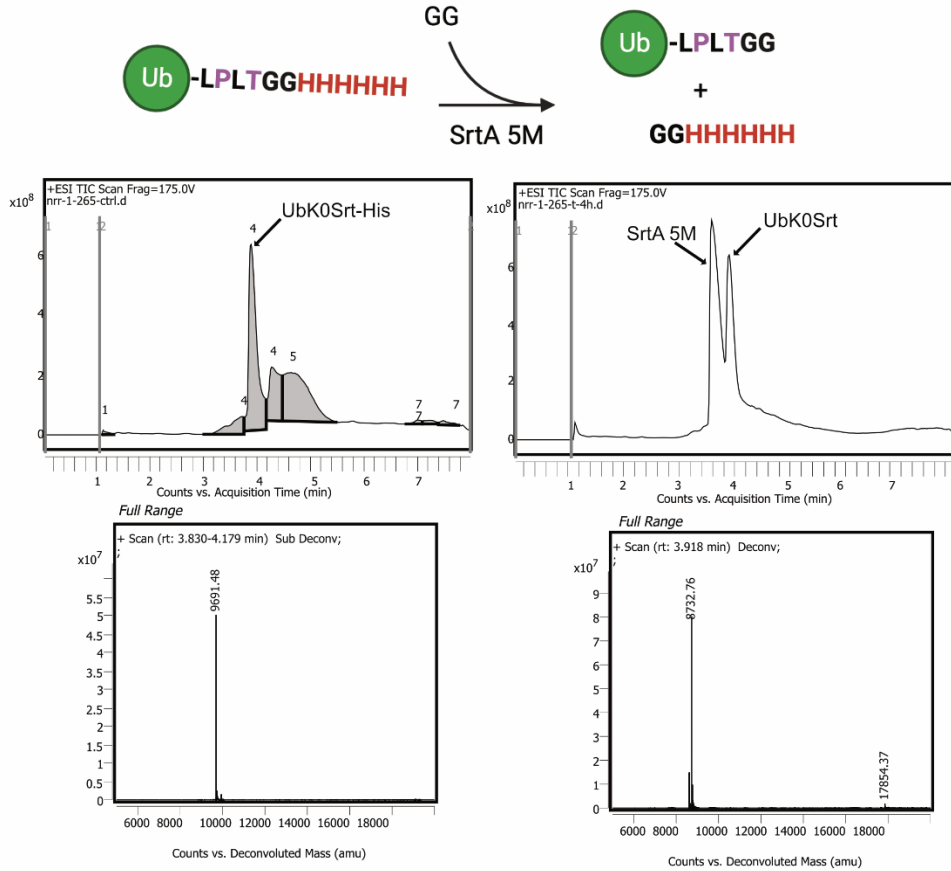

Supplemental Figure I: Mass spectrometry of His-tag cleaved from UbK48SrtHis by GG transamidation. We observed a small species that corresponded to the hydrolyzed UbK48LPLT, but in the presence of 1 mM GG peptide, ~80% of cleaved product contained the UbK48Srt with complete LPLTGG sequence at the C-terminus. The observed mass of 17853 Da corresponds to SrtA 5M in the experiment. TIC peak that was used for mass deconvolution is indicated with an arrow.

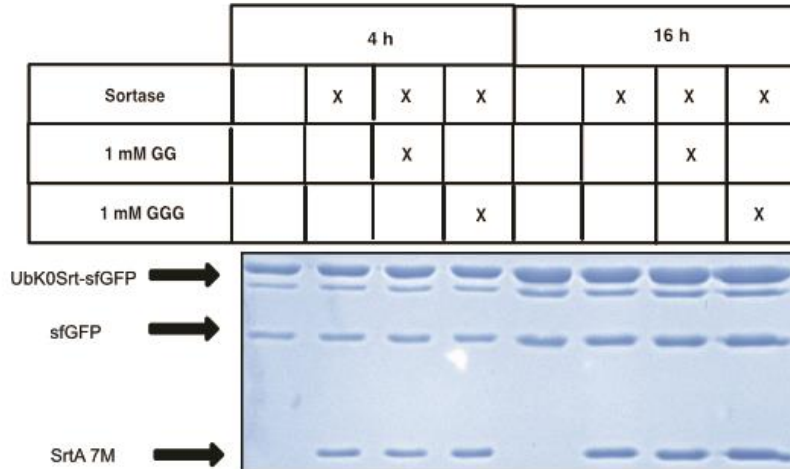

Supplemental Figure II: SrtA 7M does not hydrolyze UbK0Srt-sfGFP. Purified UbK0Srt-sfGFP was subjected to hydrolysis by SrtA 7M at 37 °C for either 4 hours (lanes 2-5) or 16 hours (lanes 6-9). UbK0Srt-sfGFP remained intact when subjected to SrtA 7M in the presence of SrtA 7M reaction buffer, SrtA 7M reaction buffer + 1 mM GG, and SrtA 7M reaction buffer + 1 mM GGG.

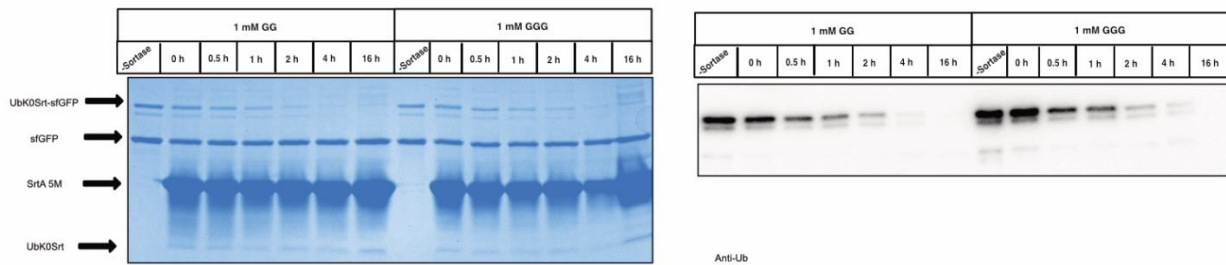

Supplemental Figure III: SrtA 5M hydrolyzes UbK0Srt-sfGFP in the presence of GG and GGG nucleophiles. Purified UbK0Srt-sfGFP was subjected to hydrolysis by SrtA 5M at 37 °C for the specified times in the presence of SrtA 5M buffer as well as 1 mM GG or 1 mM GGG. UbK0Srt-sfGFP was gradually cleaved, with near-complete cleavage observed after 4 hours and complete cleavage observed after 16 hours in the presence of both GG and GGG. Left: 4-20% SDS-PAGE gel stained with Coomassie blue. Right: Anti-Ubiquitin Western blot.

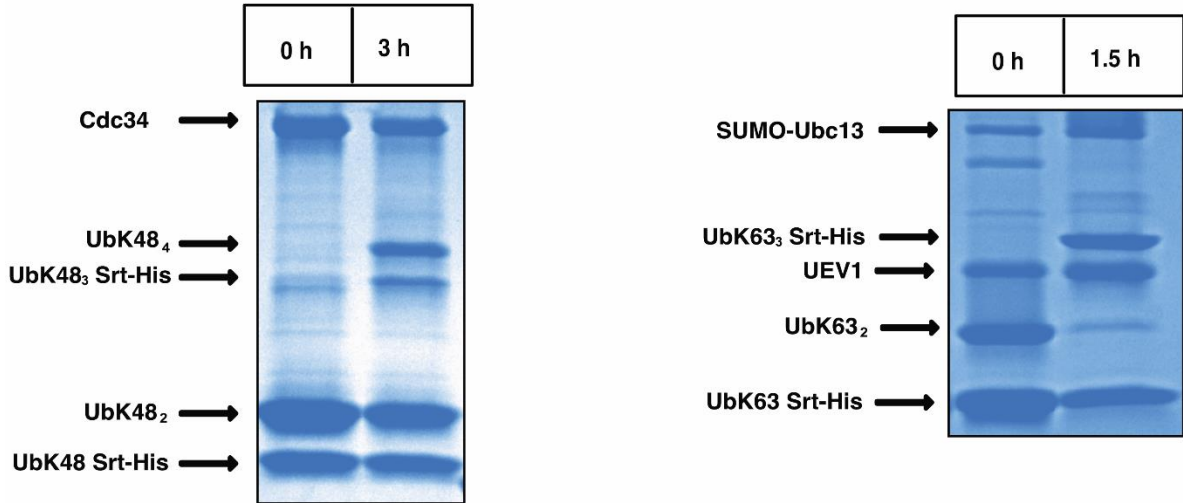

Supplemental Figure IV: Triubiquitin and higher chains are readily achieved for both K48-linked polyubiquitin (left) and K63-linked polyubiquitin (right) by using purified wild type Ub(n-1) in lieu of monoubiquitin.

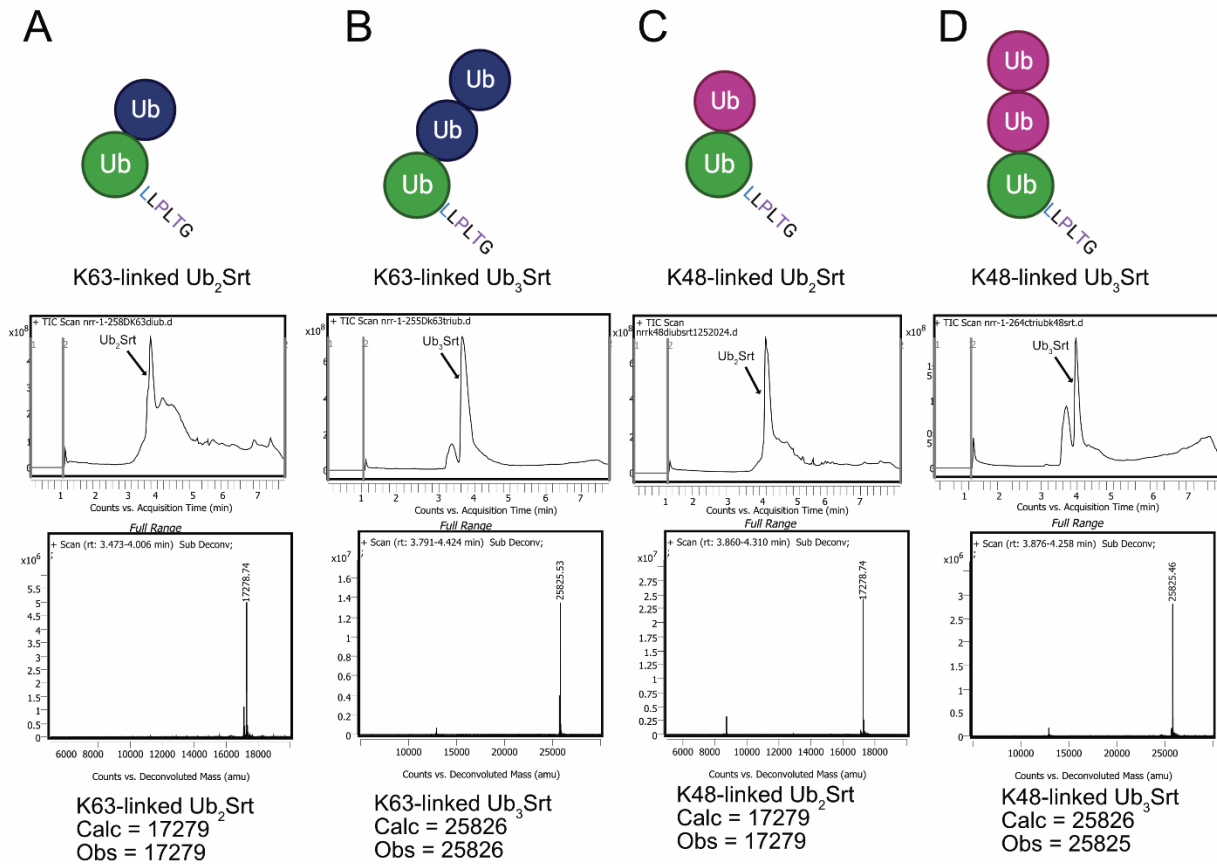

Supplemental Figure V: Intact protein LC-QTOF of polyubiquitin chains. A) TIC and deconvoluted spectra of K63-linked di-ubiquitin. B) TIC and deconvoluted spectra of K63-linked tri-ubiquitin. C) TIC and deconvoluted spectra of K48-linked di-ubiquitin. D) TIC and deconvoluted spectra of K48-linked tri-ubiquitin.

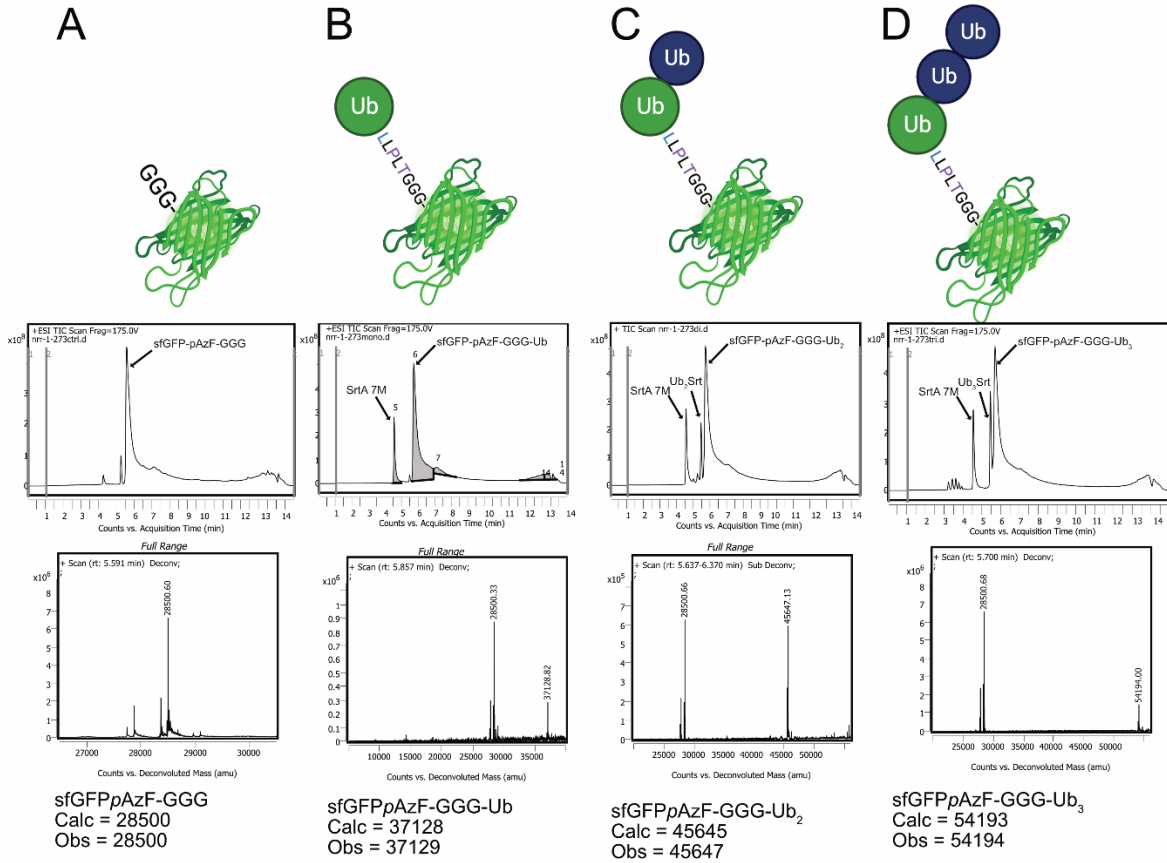

Supplemental Figure VI: Intact protein LC-QTOF of sortase-mediated ubiquitination of sfGFP150pAzF-DBCO-GGG. TIC peak that was used for mass deconvolution is indicated with an arrow. (A) Control reaction with no SrtA present. (B) Monoubiquitination of sfGFP150pAzF-DBCO-GGG. (C) Di-ubiquitination of sfGFP-150pAzF-DBCO-GGG. (D) Tri-ubiquitination of sfGFP-150pAzF-DBCO-GGG.



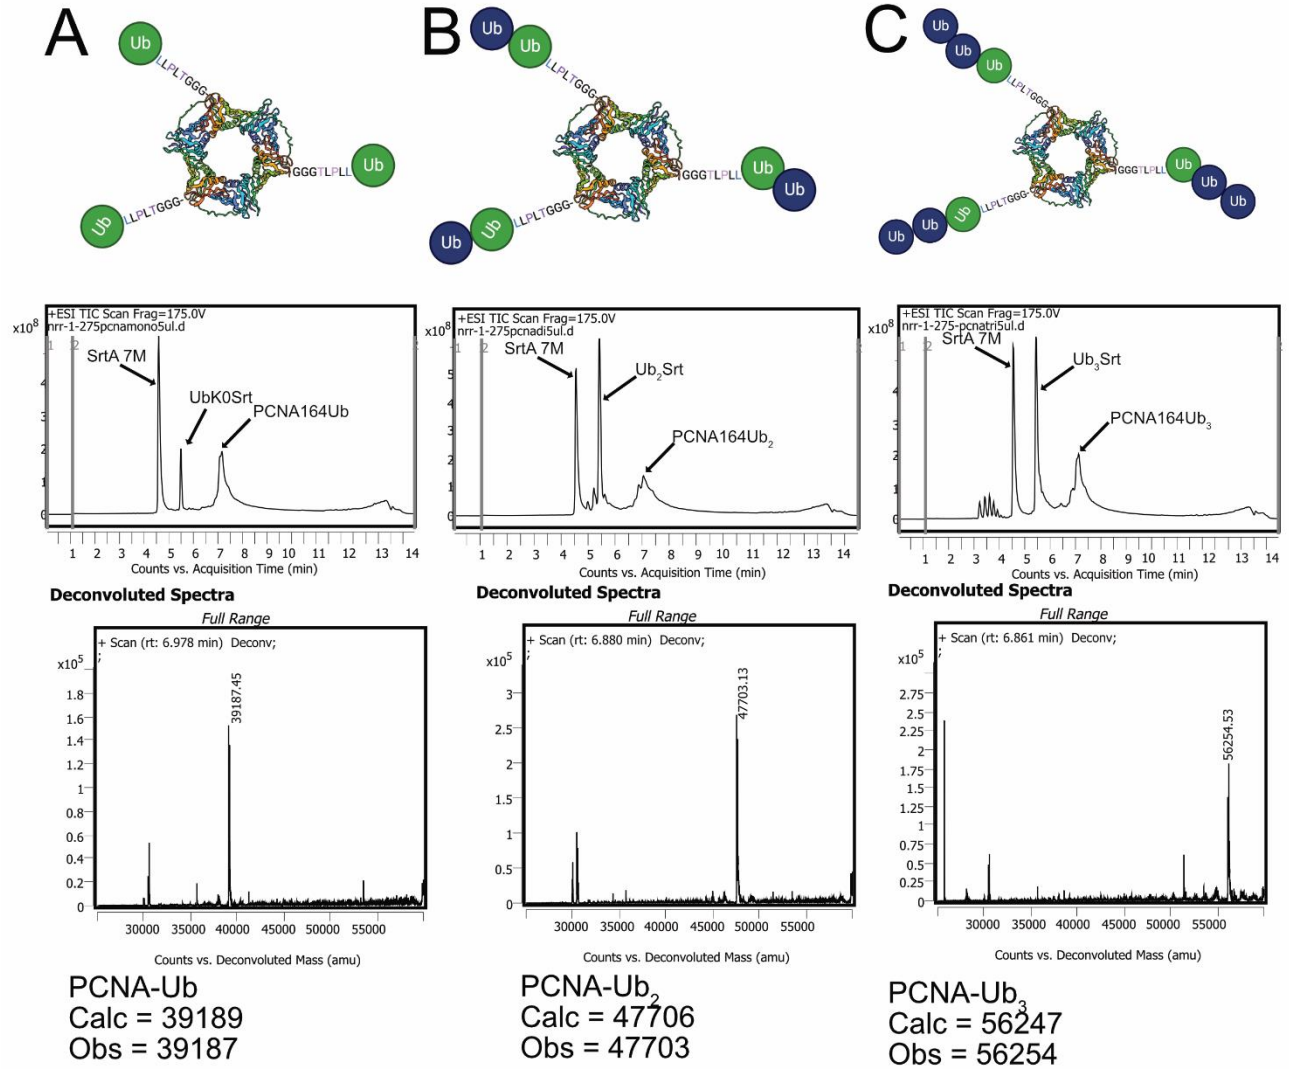

Supplemental Figure VII: Intact protein LC-QTOF of sortase mediated ubiquitination of PCNA. TIC peak which was used for the deconvoluted spectra is indicated by an arrow. (A) Monoubiquitination of PCNA-164pAzF-DBCO-GGG. (B) Di-ubiquitination of PCNA-164pAzF-DBCO-GGG. (C) Tri-ubiquitination of PCNA-164pAzF-DBCO-GGG.

## References

1. Pickart, C.M. and S. Raasi, *Controlled synthesis of polyubiquitin chains*. Methods Enzymol, 2005. **399**: p. 21-36.
2. Carvalho, A.F., et al., *High-Yield Expression in Escherichia coli and Purification of Mouse Ubiquitin-Activating Enzyme E1*. Molecular Biotechnology, 2012. **51**(3): p. 254-261.
3. Ptak, C., et al., *Purification and properties of the ubiquitin-conjugating enzymes Cdc34 and Ubc13.Mms2*. Methods Enzymol, 2005. **398**: p. 43-54.
4. Dong, K.C., et al., *Preparation of distinct ubiquitin chain reagents of high purity and yield*. Structure, 2011. **19**(8): p. 1053-63.
5. Beyer, J.N., et al., *Overcoming Near-Cognate Suppression in a Release Factor 1-Deficient Host with an Improved Nitro-Tyrosine tRNA Synthetase*. J Mol Biol, 2020. **432**(16): p. 4690-4704.
6. Michel, M.A., D. Komander, and P.R. Elliott, *Enzymatic Assembly of Ubiquitin Chains*, in *The Ubiquitin Proteasome System: Methods and Protocols*, T. Mayor and G. Kleiger, Editors. 2018, Springer New York: New York, NY. p. 73-84.
